# Supplementary material
Source: publisher site journal article supplement (http://www.kjim.org/upload/media/kjim-2021-338-suppl1.pdf)
Supplement: Supplementary file 1 [file kjim-2021-338-suppl1.pdf]

**Supplementary Table 1. The comparison of biochemical tests between the groups and visits**

| Variable                | Screening           |                             | Week 24             |                             | Change of values (24 weeks–baseline) |                             |                             |
|-------------------------|---------------------|-----------------------------|---------------------|-----------------------------|--------------------------------------|-----------------------------|-----------------------------|
|                         | Value               | <i>p</i> value <sup>a</sup> | Values              | <i>p</i> value <sup>a</sup> | Difference                           | <i>p</i> value <sup>a</sup> | <i>p</i> value <sup>b</sup> |
| AST, IU/L               |                     | 0.449 <sup>c</sup>          |                     | 0.193 <sup>c</sup>          |                                      | 0.449 <sup>c</sup>          |                             |
| Placebo                 | 33 (28–46)          |                             | 31 (26–40)          |                             | –2 (–5 to 4)                         |                             | 0.543 <sup>d</sup>          |
| L-carnitine             | 38 (27–56)          |                             | 37 (27–44)          |                             | –3 (–16 to 4)                        |                             | 0.014 <sup>d</sup>          |
| ALT, IU/L               |                     | 0.520 <sup>c</sup>          |                     | 0.988 <sup>c</sup>          |                                      | 0.520 <sup>c</sup>          |                             |
| Placebo                 | 24 (18–35)          |                             | 25 (19–36)          |                             | 0 (–5 to 3)                          |                             | 0.563 <sup>d</sup>          |
| L-carnitine             | 26 (20–32)          |                             | 23 (19–35)          |                             | 1 (–6 to 6)                          |                             | 0.982 <sup>d</sup>          |
| Albumin, g/dL           |                     | 0.549 <sup>c</sup>          |                     | 0.794 <sup>c</sup>          |                                      | 0.243 <sup>c</sup>          |                             |
| Placebo                 | 4.2 (3.7–4.6)       |                             | 4.2 (4–4.6)         |                             | 0.1 (–0.1 to 0.3)                    |                             | 0.084 <sup>d</sup>          |
| L-carnitine             | 4.4 (3.8–4.7)       |                             | 4.4 (3.9–4.5)       |                             | 0 (–0.2 to 0.2)                      |                             | 0.987 <sup>d</sup>          |
| Total bilirubin, mg/dL  |                     | 0.989 <sup>c</sup>          |                     | 0.116 <sup>c</sup>          |                                      | 0.003 <sup>c</sup>          |                             |
| Placebo                 | 1 (0.7–1.6)         |                             | 1 (0.8–1.5)         |                             | 0.1 (–0.1 to 0.3)                    |                             | 0.001 <sup>d</sup>          |
| L-carnitine             | 0.9 (0.8–1.2)       |                             | 0.9 (0.7–1.2)       |                             | 0 (–0.2 to 0.1)                      |                             | 0.403 <sup>d</sup>          |
| Prothrombin time, INR   |                     | 0.647 <sup>c</sup>          |                     | 0.693 <sup>c</sup>          |                                      | 0.100 <sup>c</sup>          |                             |
| Placebo                 | 1.2 (1.1–1.2)       |                             | 1.1 (1.1–1.2)       |                             | 0 (0 to 0)                           |                             | 0.904 <sup>d</sup>          |
| L-carnitine             | 1.2 (1.1–1.2)       |                             | 1.1 (1.1–1.2)       |                             | 0 (–0.1 to 0)                        |                             | 0.044 <sup>d</sup>          |
| Creatinine, mg/dL       |                     | 0.799 <sup>c</sup>          |                     | 0.829 <sup>c</sup>          |                                      | 0.951 <sup>c</sup>          |                             |
| Placebo                 | 0.8 (0.7–1)         |                             | 0.8 (0.7–0.9)       |                             | 0 (–0.1 to 0.1)                      |                             | 0.712 <sup>d</sup>          |
| L-carnitine             | 0.8 (0.6–0.9)       |                             | 0.9 (0.7–1)         |                             | 0 (–0.1 to 0.1)                      |                             | 0.725 <sup>d</sup>          |
| MELD                    |                     | 0.868 <sup>c</sup>          |                     | 0.409 <sup>c</sup>          |                                      | 0.003 <sup>c</sup>          |                             |
| Placebo                 | 8 (7–10)            |                             | 8 (7–11)            |                             | 0 (0 to 1)                           |                             | 0.047                       |
| L-carnitine             | 8 (7–10)            |                             | 8 (7–9)             |                             | 0 (–1 to 0)                          |                             | 0.008                       |
| Sodium, mEq/L           |                     | 0.544 <sup>c</sup>          |                     | 0.544 <sup>c</sup>          |                                      | 0.867 <sup>e</sup>          |                             |
| Placebo                 | 140 (138–142)       |                             | 141 (139–142)       |                             | 0 (–2 to 2)                          |                             | 0.495 <sup>f</sup>          |
| L-carnitine             | 140 (138–142)       |                             | 140 (138–141)       |                             | 0.5 (–1 to 3)                        |                             | 0.426 <sup>f</sup>          |
| Ammonia, μmol/L         |                     | 0.567 <sup>c</sup>          |                     | 0.824 <sup>c</sup>          |                                      | 0.567 <sup>c</sup>          |                             |
| Placebo                 | 85 (65–118)         |                             | 74 (57–118)         |                             | –8 (–29 to 18)                       |                             | 0.313 <sup>d</sup>          |
| L-carnitine             | 79 (58–113)         |                             | 75 (60–96)          |                             | –8 (–25 to 9)                        |                             | 0.064 <sup>d</sup>          |
| Total carnitine, μmol/L |                     | 0.676 <sup>c</sup>          |                     | < 0.0001 <sup>e</sup>       |                                      | 0.676 <sup>c</sup>          |                             |
| Placebo                 | 67.7 (56.8–73.5)    |                             | 62.9 (54.4–70.2)    |                             | –4.2 (–9.4 to 3)                     |                             | 0.081 <sup>f</sup>          |
| L-carnitine             | 66.2 (57.9–74.8)    |                             | 74.9 (66.2–90.2)    |                             | 10.1 (–5.9 to 19)                    |                             | 0.039 <sup>f</sup>          |
| Acyl carnitine, μmol/L  |                     | 0.215 <sup>e</sup>          |                     | 0.046 <sup>c</sup>          |                                      | 0.215 <sup>e</sup>          |                             |
| Placebo                 | 12.4 (7.1–15.1)     |                             | 8.5 (6.6–15.1)      |                             | –0.8 (–8.4 to 3.3)                   |                             | 0.267 <sup>f</sup>          |
| L-carnitine             | 13.1 (7.7–18.1)     |                             | 12 (8.2–20.5)       |                             | 0.8 (–8.5 to 7.1)                    |                             | 0.779 <sup>f</sup>          |
| Free carnitine, μmol/L  |                     | 0.953 <sup>c</sup>          |                     | < 0.0001 <sup>e</sup>       |                                      | 0.953 <sup>c</sup>          |                             |
| Placebo                 | 52.8 (45.7–63.4)    |                             | 50.5 (44.8–59.2)    |                             | 1.3 (–9.2 to 7.1)                    |                             | 0.660 <sup>f</sup>          |
| L-carnitine             | 52.5 (45.3–62.3)    |                             | 65.6 (53.3–78.1)    |                             | 11.9 (–3.5 to 23)                    |                             | < 0.001 <sup>f</sup>        |
| LPS, EU/mL              |                     | 0.527 <sup>c</sup>          |                     | 0.545 <sup>c</sup>          |                                      | 0.527 <sup>c</sup>          |                             |
| Placebo                 | 1,000 (365.1–1,000) |                             | 1,000 (378.6–1,000) |                             | 0 (–138.2 to 196.7)                  |                             | 0.590 <sup>d</sup>          |
| L-carnitine             | 1,000 (274.6–1,000) |                             | 972.3 (310.8–1,000) |                             | 0 (–174.4 to 231.2)                  |                             | 0.827 <sup>d</sup>          |

Values are presented as median (interquartile range).

AST, aspartate aminotransferase; ALT, alanine aminotransferase; INR, international normalized ratio; MELD, model for end-stage liver disease; LPS, lipopolysaccharides.

<sup>a</sup>Comparison between the groups.

<sup>b</sup>Comparison within the groups.

<sup>c</sup>Wilcoxon's rank sum test.

<sup>d</sup>Wilcoxon Signed rank test.

<sup>e</sup>Two sample *t* test.

<sup>f</sup>Paired *t* test.
